# Supplementary material for: Synthesis of zeolite-like metal–organic frameworks via a dual-ligand strategy
Source: Royal Society of Chemistry journal article supplement (doi:10.1039/c7ce00332c), 2017-01-01
Supplement: c7ce00332c1.pdf [file c7ce00332c1.pdf]

Supporting information

## **Synthesis of Zeolite-like Metal-organic Frameworks from a Dual-ligand Strategy**

**Yu-Huan Tang,<sup>ab</sup> Xin Wu,<sup>a</sup> Fei Wang\*<sup>a</sup> and Jian Zhang\*<sup>a</sup>**

<sup>a</sup>State Key Laboratory of Structural Chemistry, Fujian Institute of Research on the Structure of Matter, the Chinese Academy of Sciences, Fuzhou, Fujian 350002, P. R. China. E-mail:

[wangfei04@fjirsm.ac.cn](mailto:wangfei04@fjirsm.ac.cn), [zhj@fjirsm.ac.cn](mailto:zhj@fjirsm.ac.cn)

<sup>b</sup>University of Chinese Academy of Sciences, 100049 Beijing, P. R. China

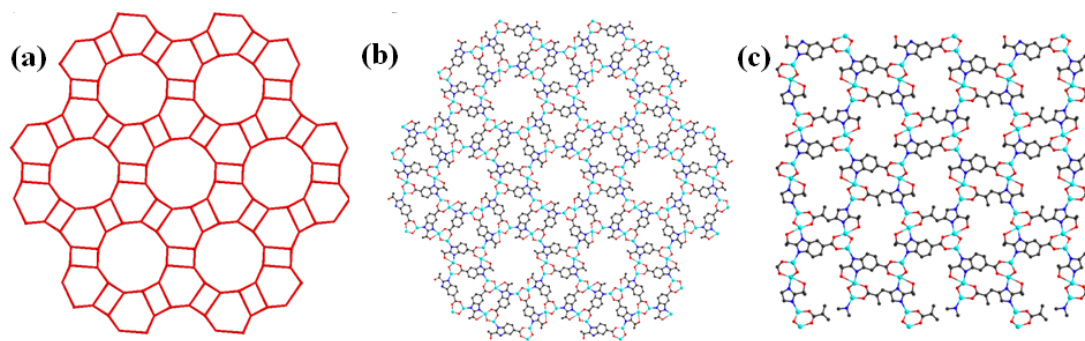

**Figure S1** (a) AlPO<sub>4</sub>-5 layer, (b) the layer generated by ebimc ligands and dizinc units within compound **1**, (c) the layer generated by ebimc ligands and dizinc units within compound **2**.

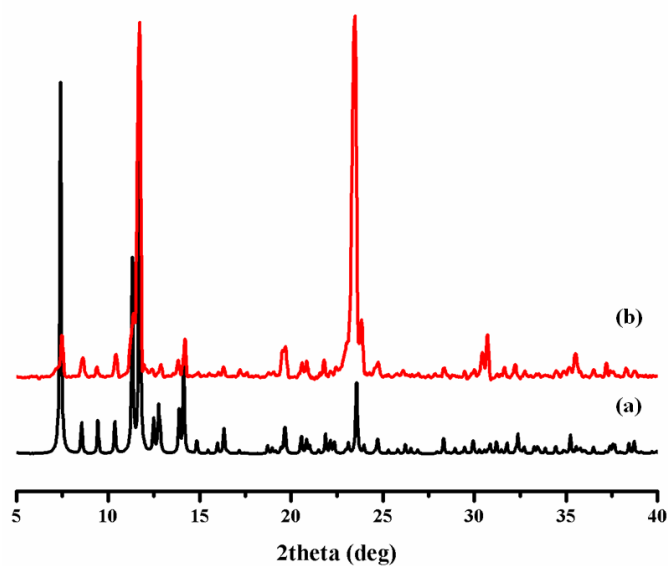

**Figure S2** The powder XRD patterns of (**1**). (a) simulated (**1**); (b) as-synthesized (**1**)

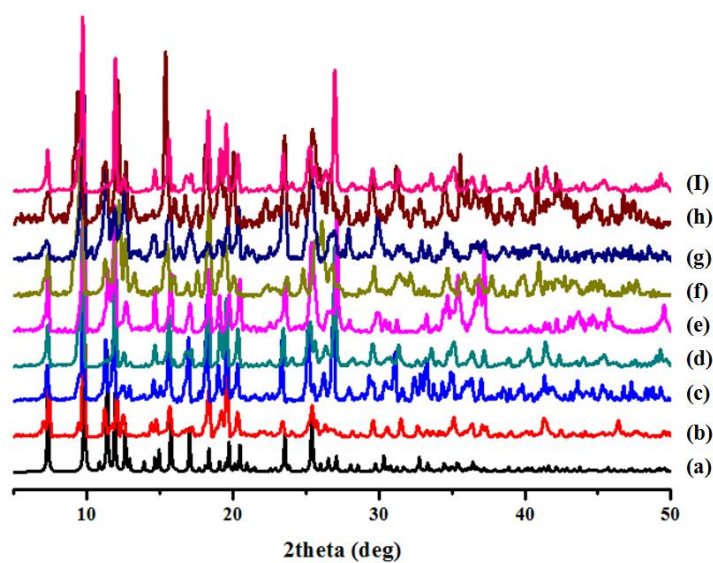

**Figure S3** The powder XRD patterns of (**2**) under different conditions. (a) simulated

(2); (b) as-synthesized (2); (c) (2) soaked in DMF; (d) (2) soaked in ethanol; (e) (2) soaked in H<sub>2</sub>O; (f) (2) soaked in methanol; (g) (2) soaked in acetone; (h) (2) soaked in CH<sub>2</sub>Cl<sub>2</sub>; (I) activated (2).

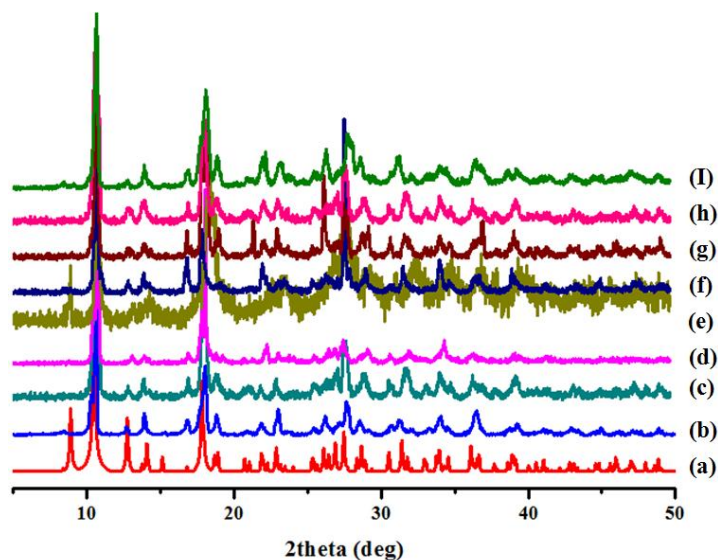

**Figure S4** The powder XRD patterns of (3) under different conditions. (a) simulated (3); (b) as-synthesized (3); (c) (3) soaked in DMF; (d) (3) soaked in ethanol; (e) (3) soaked in H<sub>2</sub>O; (f) (3) soaked in methanol; (g) (3) soaked in acetone; (h) (3) soaked in CH<sub>2</sub>Cl<sub>2</sub>; (I) activated (3).

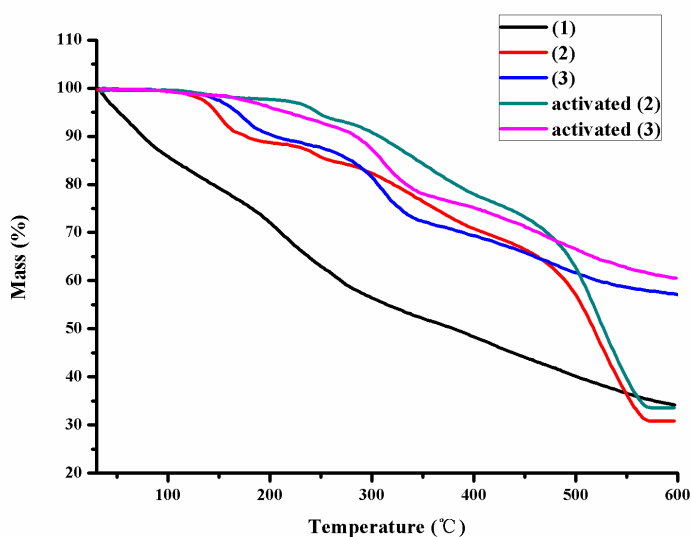

**Figure S5** The TG plots of compounds (1), (2) and (3).

In compound 2, the number of residual electrons after SQUEEZE is 12.5, corresponding to 5/4 water molecules. However, from the TG plot, the initial gradual weight-loss step of 13% in the

TGA, which indicates one guest DMF molecule and one water molecule per  $Zn_2(\mu_2-OH)(ebimc)(5-mtz)$  unit for compound 2. As for 1, we identify one DMF per  $Zn_2(\mu_2-OH)(ebimc)(5-mtz)$  unit. Considering its poor stability and no obvious platform on the TG plot, so it's meaningless to use this method to determine the remaining disordered solvent.

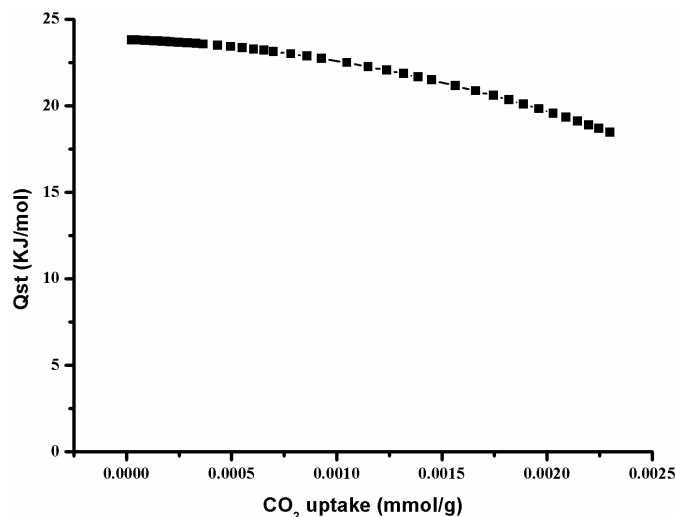

**Figure S6.** The isosteric heat of  $CO_2$  adsorption for **2** estimated by Virial equation.

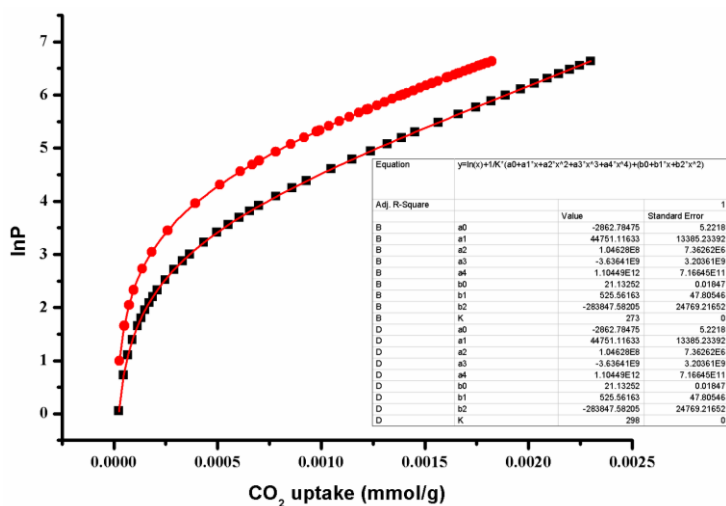

**Figure S7** Virial analysis of the  $CO_2$  sorption data for compound 2.

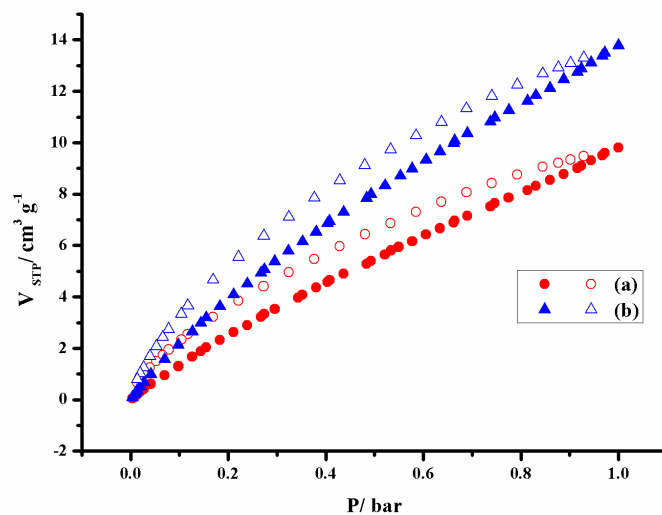

**Figure S8** The sorption isotherms of (3). The CO<sub>2</sub> adsorption and desorption (a) at 298K; the CO<sub>2</sub> adsorption and desorption (b) at 273K.

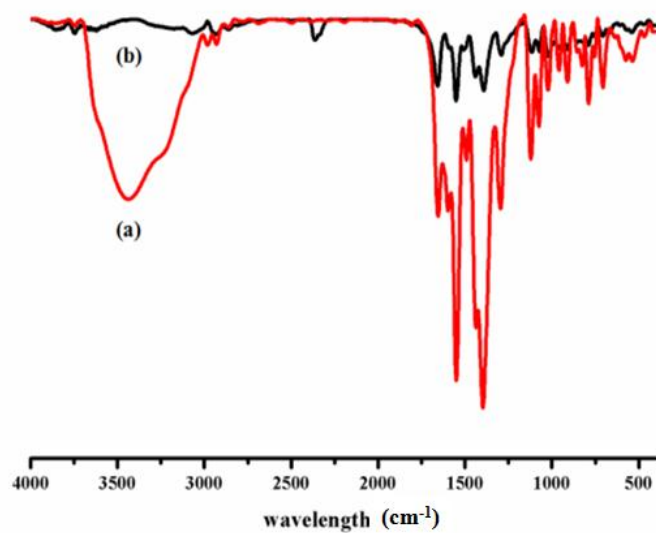

**Figure S9** The IR plots of (2); (b) the IR plots of activated (2).

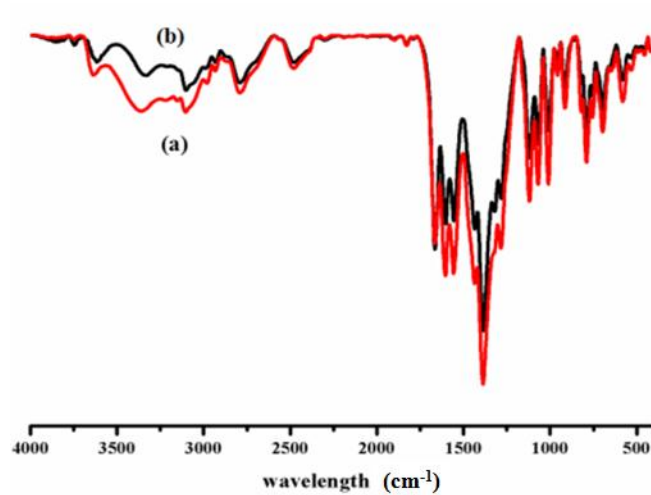

**Figure S10** The IR plots of (3); (b) the IR plots of activated (3).

The characteristic peak of DMF molecules ( $\sim 1600\text{cm}^{-1}$ ) are covered by the peak of crystals, which can not provide evidence for complete activation.
